# Supplementary material for: Highly transparent, self-healing and adhesive wearable ionogel as strain and temperature sensor
Source: Royal Society of Chemistry journal article supplement (doi:10.1039/d2py00594h), 2022-01-01
Supplement: d2py00594h1.pdf [file d2py00594h1.pdf]

## **Highly transparent, self-healing and adhesive wearable ionogel as strain and temperature sensor**

Jianfei Tie<sup>a</sup>, Zhiping Mao<sup>a,b,\*</sup>, Linping Zhang<sup>a</sup>, Yi Zhong<sup>a</sup>, Xiaofeng Sui<sup>a</sup>, Hong Xu<sup>a\*</sup>

*a Key Lab of Science and Technology of Eco-textile, Ministry of Education, College of Chemistry, Chemical Engineering and Biotechnology, Innovation Center for Textile Science and Technology, Donghua University, Shanghai 201620, People's Republic of China.*

*b National Manufacturing Innovation Center of Advanced Dyeing and Finishing Technology, Taian City, Shandong Province, 271000, People's Republic of China.*

*\* Corresponding authors:*

*Address: No.2999 North Renmin Road, Shanghai 201620, People's Republic of China.*

*Tel: +86-21-67792720; Fax: +86-21-67792707*

*E-mail addresses: hxu@dhu.edu.cn (H. Xu); zhpmo@dhu.edu.cn (Z. Mao)*

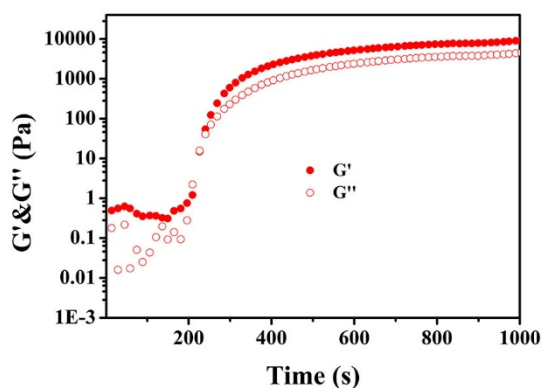

Fig. S1 The gelation time of the ionogel triggered by UV light.

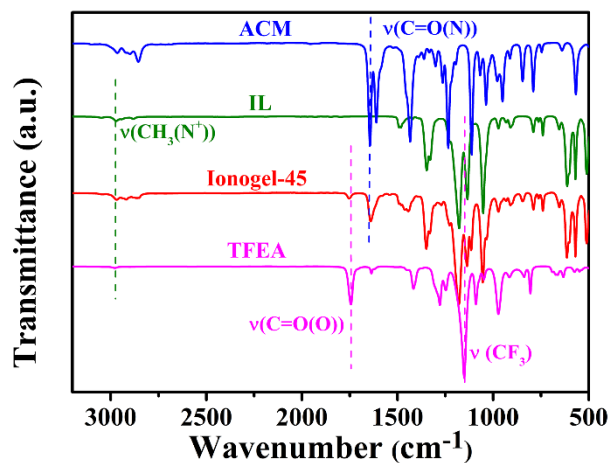

Fig. S2 FTIR spectra of the IL, TFEA, ACM and Ionogel-45.

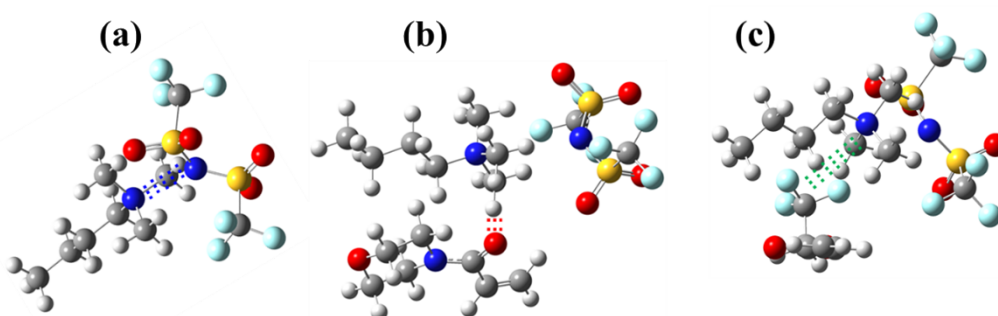

Fig. S3 DFT calculations of molecule structures and binding energies. (a) Intramolecular interaction of one  $[N_{4111}] [NTf_2]$  molecule with the calculated attractive binding energy of  $125.81 \text{ kcal mol}^{-1}$ ; (b) One monomer of ACM interact with one monomer of  $[N_{4111}] [NTf_2]$ , and the attractive binding energy was calculated as  $15.15 \text{ kcal mol}^{-1}$ ; (c) One monomer of TFEA interact with one monomer

of  $[N_{4111}] [NTf_2]$ , and the attractive binding energy was calculated as  $9.43 \text{ kcal mol}^{-1}$ .

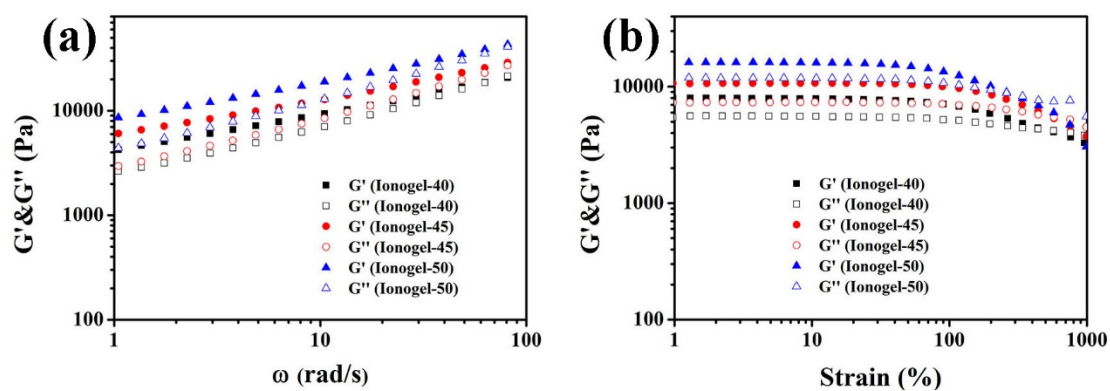

**Fig. S4** (a) Rheology analyses of the storage modulus  $G'$  (filled symbols) and loss modulus  $G''$  (empty symbols) on frequency sweep (25 °C, frequency = 1.0 Hz); (b)  $G'$  and  $G''$  versus strain for the ionogel (25 °C, strain: 1%).

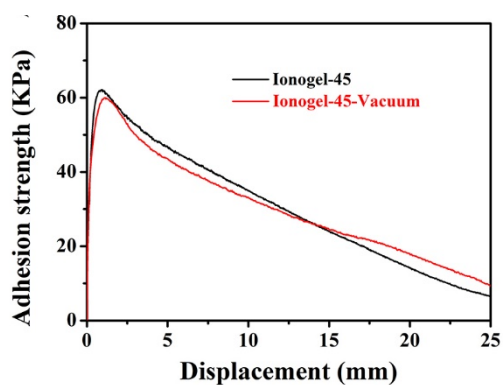

**Fig. S5** The adhesion strength between silicone and the ionogel-45 placed in vacuum environment for 48 h.

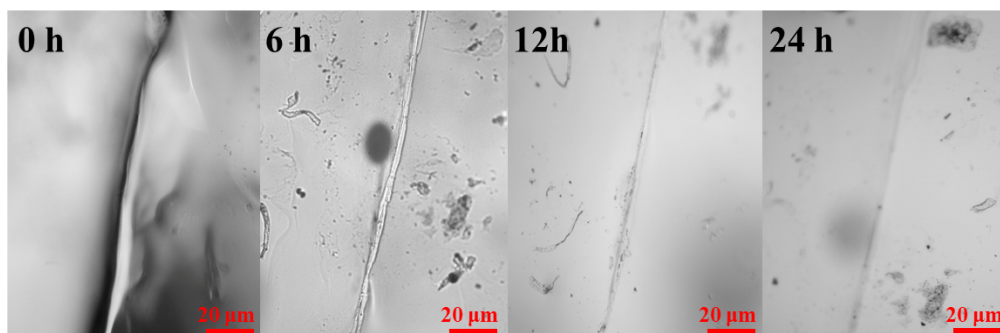

**Fig. S6** The images of the self-healing process recorded by optical microscope at different time points.

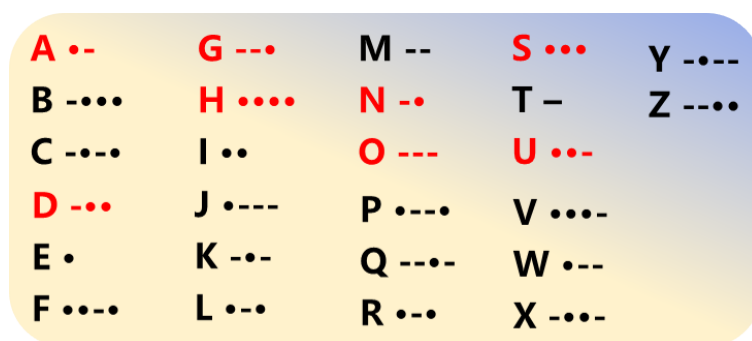

**Fig. S7** Morse code.

**Table. S1** Comparison of sensing properties and mechanical performance based on the ionogels

| Sample                                  | Tensile Strain (%) | Tensile Strength (MPa) | Performance                       |                                   |                   | Ref.             |
|-----------------------------------------|--------------------|------------------------|-----------------------------------|-----------------------------------|-------------------|------------------|
|                                         |                    |                        | Self-healing efficiency (24 h, %) | Sensing range of temperature (°C) | Gauge Factor (GF) |                  |
| MIS                                     | 1213               | 1.29                   | -                                 | 25-95                             | 2.31              | 13               |
| P(TFEA-co-AAM)                          | 2066               | 0.11                   | 99                                | -40-40                            | 1.38              | 21               |
| PAA-Zn/ZnO/IL                           | 660                | 5.42                   | 39                                | -                                 | -                 | 43               |
| IE                                      | 300                | 0.17                   | -                                 | 30-140                            | 1.98              | 44               |
| DN                                      | 700                | 0.37                   | -                                 | -30-60                            | 1.1               | 52               |
| Fe <sub>3</sub> O <sub>4</sub> @PAA/PAA | 2000               | 0.036                  | 95                                | -                                 | 3.96              | 53               |
| <b>Ionogel</b>                          | <b>1500</b>        | <b>0.13</b>            | <b>100%</b>                       | <b>-20-120</b>                    | <b>5.3</b>        | <b>This work</b> |
